# Supplementary material
Source: publisher site journal article supplement (https://www.dovepress.com/get_supplementary_file.php?f=231907.docx)
Supplement: Supplementary file 1 [file get_supplementary_file.php]

**Supplemental Table 1.** Collection of clinical data using the Electronic Portal

The questions were translated from Dutch into English.

| **Variable** | **Question in the Electronic Portal (EP)** | **Variable categories** (answer option questions in EP) |
| --- | --- | --- |
| Physician-diagnosed asthma | Is your child diagnosed with asthma?   - 1. Yes, by a general practitioner   2. Yes, by a pediatrician   3. Yes, by a pulmonologist   4. No | Yes (a, b or c) or No (d) |
| Both parents Dutch | What ethnic group do you belong to?  Mother/Father *(separate questions)*   1. Dutch 2. Turkish 3. Moroccan 4. Surinamese 5. Antillean 6. Other | Yes (both parents a) or No |
| Maternal education level | What is the highest level of education you have completed?   - 1. Elementary school   2. Lower general secondary education   3. Intermediate vocational education   4. Higher general secondary education   5. Higher vocational education   6. University | Low (a-b), Middle (c-d) or High (e-f) |
| Family history of asthma | Do one or more family members suffer from asthma, allergic rhinitis, food allergy or atopic dermatitis? *(four separate questions)*   - 1. No   2. Yes, the father of the child   3. Yes, the mother of the child   4. Yes, brother(s) of the child   5. Yes, sister(s) of the child | Yes (b and/or c) or No |
| Family history of other atopic diseases | Do one or more family members suffer from food allergy, allergic rhinitis or atopic dermatitis? *(three separate questions)*   1. No 2. Yes, the father of the child 3. Yes, the mother of the child 4. Yes, brother(s) of the child 5. Yes, sister(s) of the child | Yes (b and/or c) or No |
| Current smoke exposure | 1. Does the mother of the child smoke in the home? 2. Does the father of the child smoke in the home? 3. Do other housemates smoke in the home? | Yes (question 1, 2 or 3 yes) or No |
| Current pet ownership | Do you own a pet? | Yes or no |
| Wheezing/coughing at night during the past year | 1. In the past 12 months, how often, on average, has your child’s sleep been disturbed due to wheezing? 2. In the past 12 months, has your child had a dry cough at night, apart from a cough associated with a cold or a chest infection? | Yes* or No  * Yes if question 1 is answered with ≥1, and/or question 2 answered with yes |
| Inhaled short-acting β2-agonists (past week) | In the past week, how often has your child inhaled a short-acting bronchodilator (e.g. Ventolin, Salbutamol, Bricanyl) on most days   - 1. Never   2. 1-2 inhalations on most days   3. 3-4 inhalations on most days   4. 5-8 inhalations on most days   5. 9-12 inhalations on most days   6. 13-16 inhalations on most days   7. ≥ 16 inhalations on most days | Yes (b-g) or No (a) |
| Inhaled corticosteroids (daily) | Has your child used daily inhaled corticosteroids (e.g. Pulmicort, Flixotide, Seretide, Qvar)?   - 1. Yes   2. No   5-item Medication Adherence Rating Scale (MARS)(1) | No (b), Yes adherent (a and MARS ≥21), Yes non-adherent (a and MARS <21) |
| Food allergy | 1. Has your child ever had a food allergy? 2. Within what time period after food ingestion did your child develop symptoms? 3. What symptoms did your child experience after food ingestion? | Yes* or No  * Yes if question 1 is answered with yes, and symptoms occurred within two hours after ingestion of the food (question 2) and food allergic symptoms were relevant (question 3): urticaria, oral allergy, angioedema, upper or lower respiratory complaints, vomiting, loss of consciousness or anaphylaxis. |
| Allergic rhinitis | 1. In the past 12 months, has your child had a problem with sneezing, or a runny, or a blocked nose when s/he did not have a cold or the flu? 2. If yes: “In the past 12 months, has this nose problem been accompanied by itchy–watery eyes? | Yes (both yes) or No |
|  |  |  |
| Atopic dermatitis | 1. Has your child ever had an itchy rash which was coming and going for at least 6 months? 2. Has your child had this itchy rash at any time in the past 12 months? | Yes (both yes) or No |
| Recurrent upper respiratory tract infections | 1. In the past 12 months, how often has your child had complaints of a middle ear infection? 2. In the past 12 months, how often has your child had complaints of croup? 3. In the past 12 months, how often has your child had complaints of a cold or laryngitis? | Yes* or No  * Yes if question 1-3 is answered with ≥6 (age 5-10 years) or ≥4 (age 10 years or older) |
| Recurrent lower respiratory tract infections | In the past 12 months, how often has your child had complaints of a severe bronchitis or pneumonia (= coughing, dyspnea and fever)? | Yes* or No  * If answered with ≥2 (all ages) |

**Supplemental Table 2.** Full multivariable logistic regression analysis with uncontrolled asthma (ACT score <20) as the outcome

|  | **Children with asthma**  n=408 | |
| --- | --- | --- |
|  | **Full multivariable analysis** | |
| **Predictor** | **OR (95% CI)** | **p*-*value** |
| Age category |  | 0.739 |
| 4 to 12 year | *Ref* |  |
| 12 to 18 year | 1.09 (0.66 to 1.79) |  |
| Male gender | 1.53 (0.97 to 2.42) | 0.067 |
| Maternal education level |  | 0.110 |
| Low | *Ref* |  |
| Middle | 1.65 (0.82 to 3.40) |  |
| High | 1.02 (0.51 to 2.08) |  |
| Family history of asthma | 2.07 (1.33 to 3.25) | 0.001 |
| Current smoke exposure | 1.53 (0.67 to 3.51) | 0.313 |
| Current pet ownership | 1.43 (0.91 to 2.26) | 0.123 |
| Inhaled corticosteroids (daily)a |  | 0.199 |
| No | *Ref* |  |
| Yes, adherent | 1.09 (0.63 to 1.88) |  |
| Yes, non-adherent | 1.76 (0.90 to 3.45) |  |
| Food allergy | 0.75 (0.41 to 1.33) | 0.320 |
| Allergic rhinitis | 0.94 (0.58 to 1.52) | 0.856 |
| Atopic dermatitis | 1.04 (0.66 to 1.65) | 0.798 |
| Recurrent upper RTIs (yes) | 2.40 (1.51 to 3.85) | <0.001 |
| Recurrent lower RTIs (yes) | 1.99 (1.23 to 3.24) | 0.005 |
| Referral reason |  | 0.001 |
| Referral for atopic diseases other than asthma | *Ref* |  |
| Referral for asthma | 2.45 (1.45 to 4.18) |  |

a Medication adherence was assessed by the Medication Adherence Rating Scale (MARS). Children with a total MARS score ≥21 were considered adherent and a score <21 were considered non-adherent.

**Abbreviations**: ACT, Asthma Control Test; CI, confidence interval; RTIs, respiratory tract infections; OR, odds ratio; Ref, Reference categories.
